# Supplementary material for: Tungsten dichalcogenide WS2xSe2−2x films via single source precursor low-pressure CVD and their (thermo-)electric properties
Source: Royal Society of Chemistry journal article supplement (doi:10.1039/d3ta00466j), 2023-01-01
Supplement: d3ta00466j1.pdf [file d3ta00466j1.pdf]

## Supporting Information of Tungsten dichalcogenide $WS_{2x}Se_{2-2x}$ films *via* single source precursor low-pressure CVD and their (thermo-)electric properties

V. Sethi,<sup>a</sup> D. Runacres,<sup>b</sup> V. Greenacre,<sup>b</sup> L. Shao,<sup>b</sup> A. L. Hector,<sup>b</sup> W. Levason,<sup>b</sup> C. H. de Groot,<sup>a</sup> G. Reid<sup>b\*</sup> and R. Huang<sup>a\*</sup>

<sup>a</sup>School of Electronics and Computer Science, University of Southampton, Southampton, SO17 1BJ, UK.

<sup>b</sup>School of Chemistry, University of Southampton, Southampton, SO17 1BJ, UK.

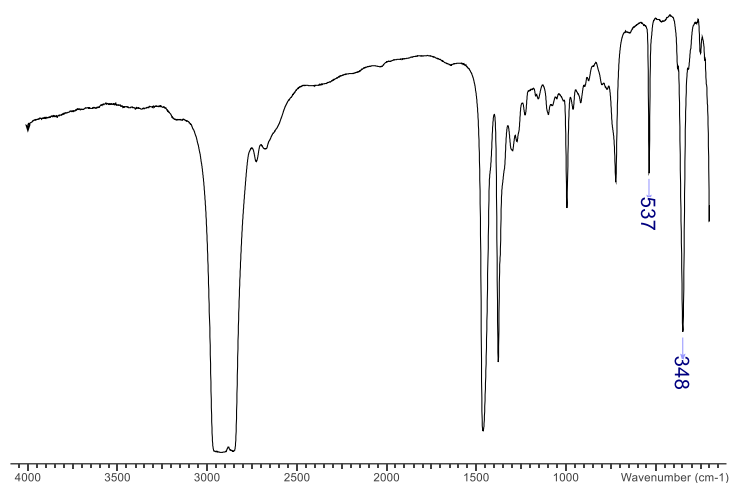

Figure S1: IR spectrum of  $[WCl_4(S^nBu_2)]$  (1) (Nujol /  $cm^{-1}$ )

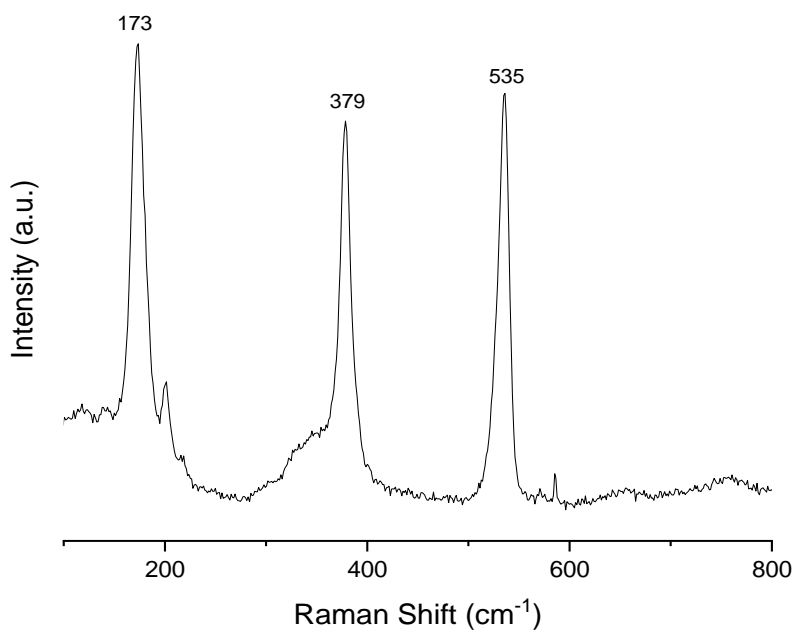

Figure S2: Raman spectrum for  $[WCl_4(S^nBu_2)]$  (1) ( $cm^{-1}$ ).

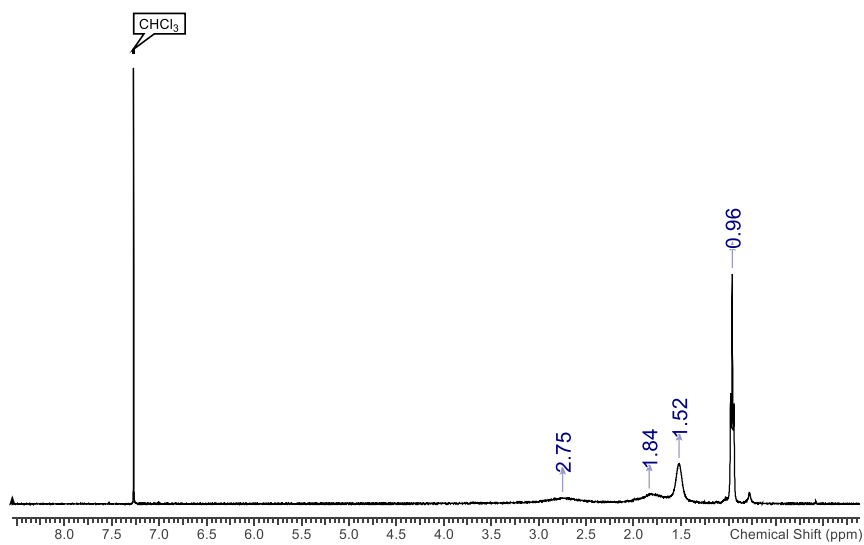

**Figure S3:** <sup>1</sup>H NMR spectrum of [WCl<sub>4</sub>(S<sup>n</sup>Bu<sub>2</sub>)] (**1**) in CDCl<sub>3</sub>.

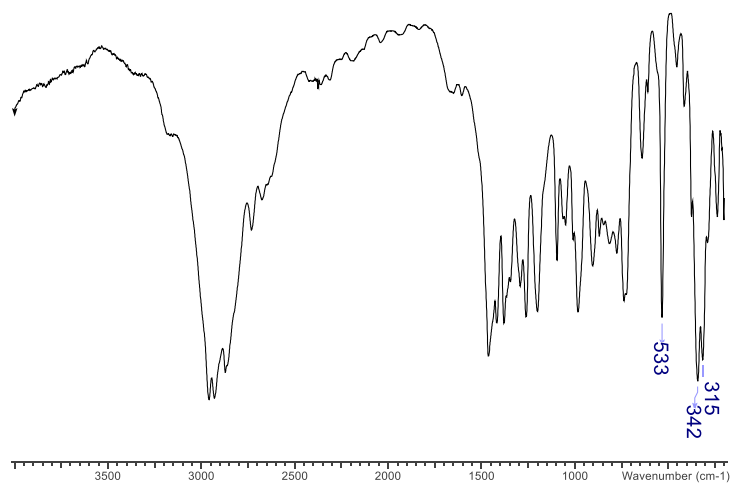

**Figure S4:** IR spectrum of [WCl<sub>4</sub>(Se<sup>n</sup>Bu<sub>2</sub>)] (**2**) (Nujol / cm<sup>-1</sup>).

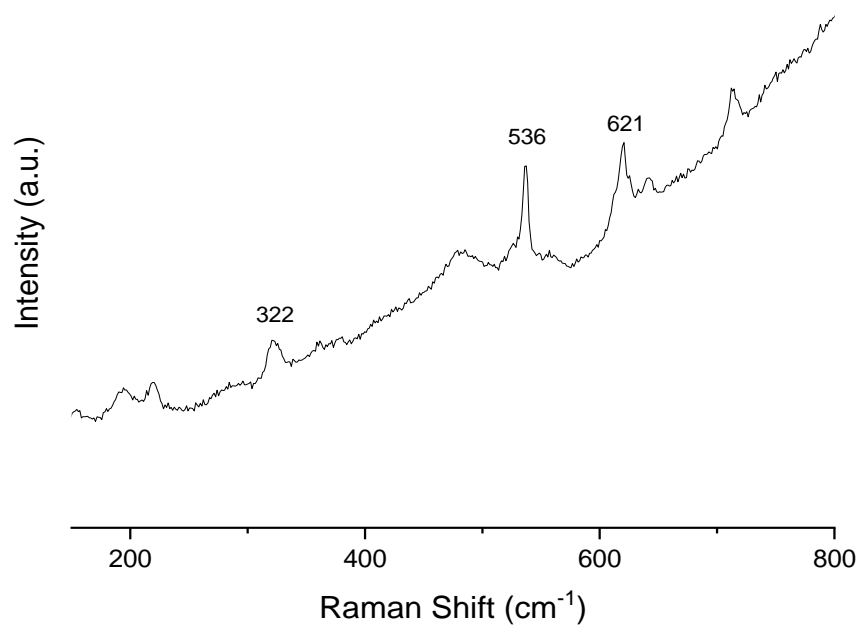

**Figure S5:** Raman spectrum for [WCl<sub>4</sub>(Se<sup>o</sup>Bu<sub>2</sub>)] (**2**) (cm<sup>-1</sup>).

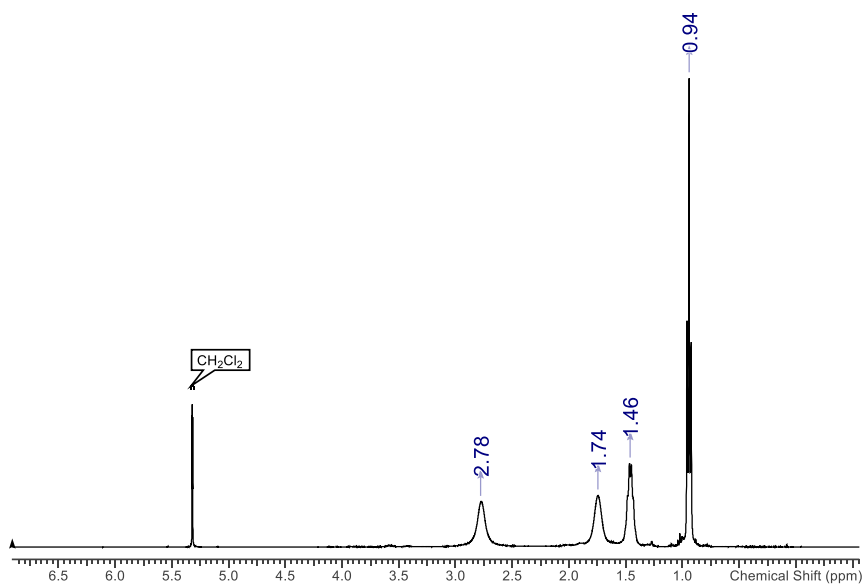

**Figure S6:** <sup>1</sup>H NMR spectrum of [WCl<sub>4</sub>(Se<sup>o</sup>Bu<sub>2</sub>)] (**2**) in CD<sub>2</sub>Cl<sub>2</sub>.

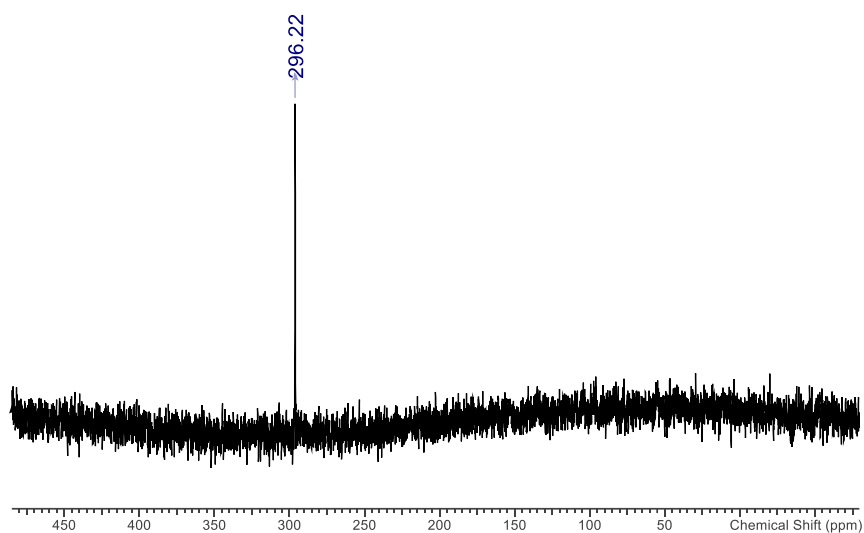

**Figure S7:**  $^{77}\text{Se}\{^1\text{H}\}$  NMR spectrum of  $[\text{WSeCl}_4(\text{Se}^n\text{Bu}_2)]$  (**2**) in  $\text{CD}_2\text{Cl}_2$ .

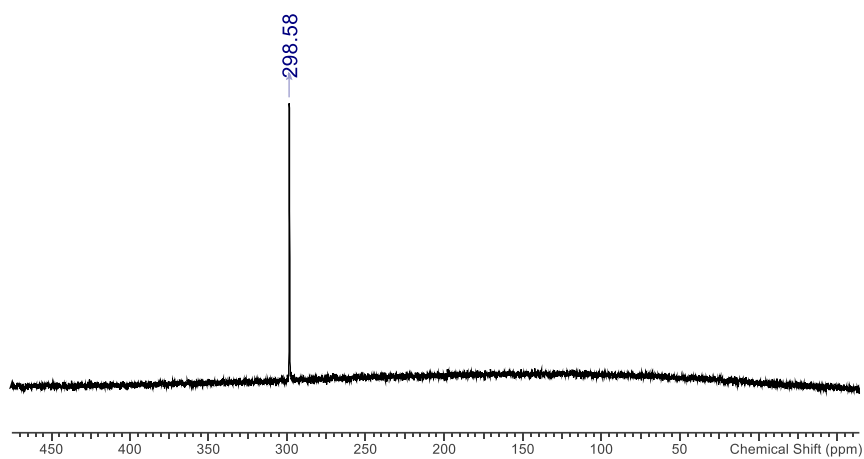

**Figure S8:**  $^{77}\text{Se}\{^1\text{H}\}$  NMR spectrum of  $[\text{WSeCl}_4(\text{Se}^n\text{Bu}_2)]$  (**2**) in  $\text{CD}_2\text{Cl}_2$  at  $-90\text{ }^\circ\text{C}$ .

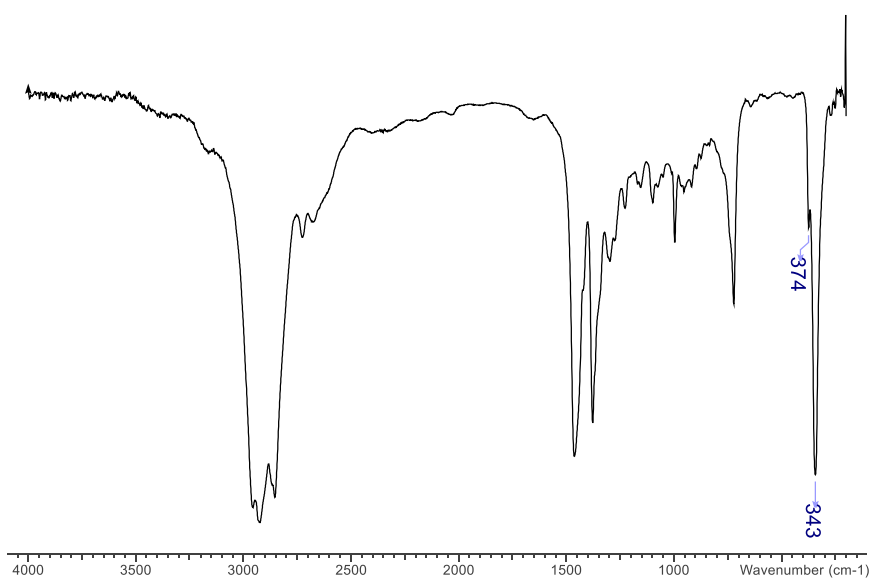

**Figure S9:** IR spectrum of  $[\text{WSeCl}_4(\text{S}^n\text{Bu}_2)]$  (**3**) ( $\text{CH}_2\text{Cl}_2$  solution in Nujol /  $\text{cm}^{-1}$ ).

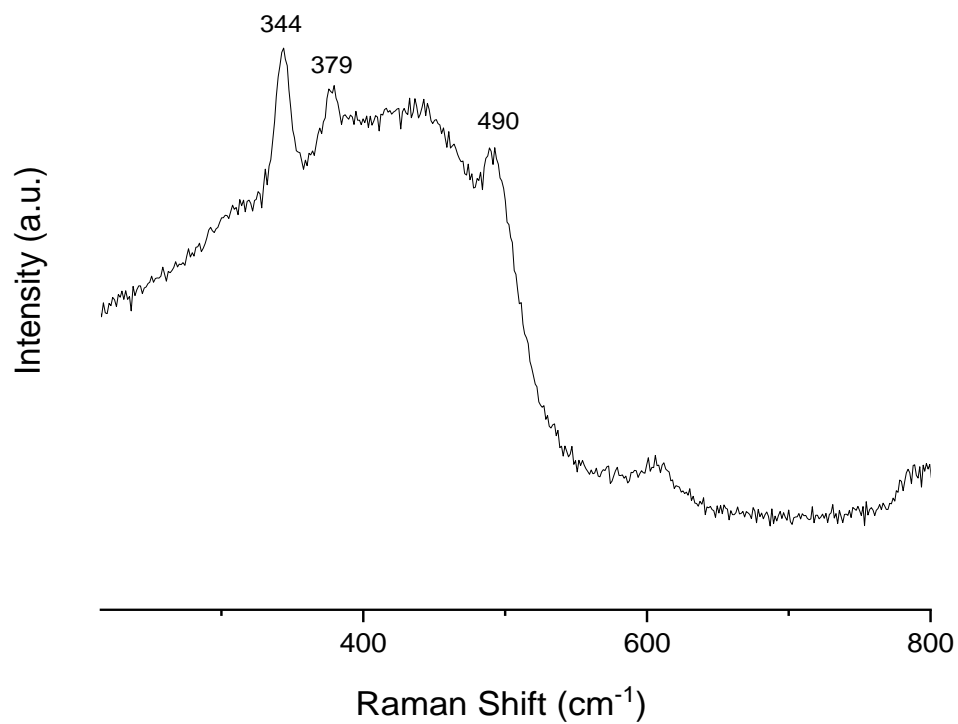

**Figure S10:** Raman spectrum for [WSeCl<sub>4</sub>(S<sup>n</sup>Bu<sub>2</sub>)] (**3**) (cm<sup>-1</sup>).

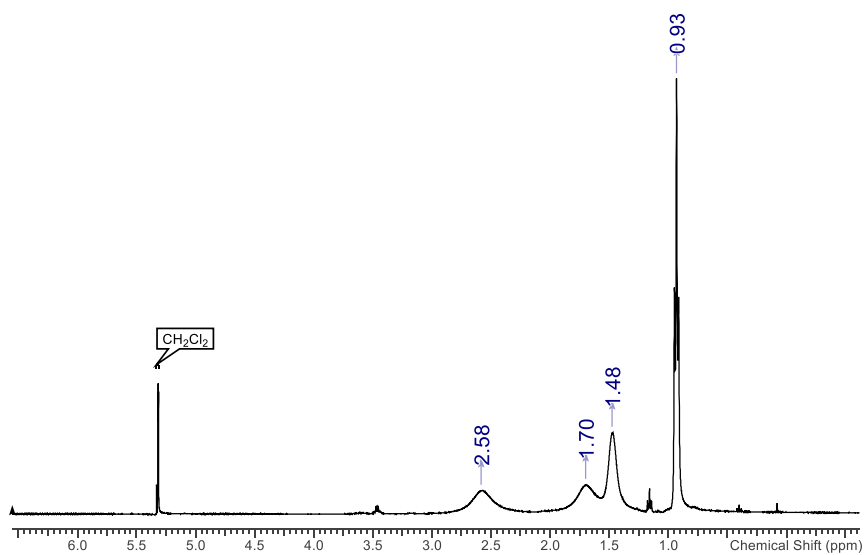

**Figure S11:** <sup>1</sup>H NMR spectrum of [WSeCl<sub>4</sub>(S<sup>n</sup>Bu<sub>2</sub>)] (**3**) in CD<sub>2</sub>Cl<sub>2</sub>.

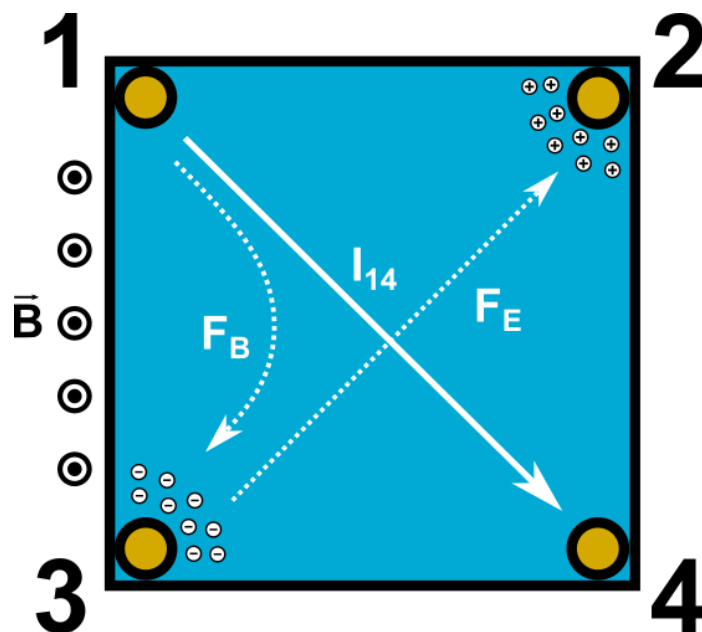

**Figure S12:** Visual depiction of a typical Hall measurement, with a current applied between contact 1 and 4 ( $I_{14}$ ). A magnetic field ( $\vec{B} = 0.5\text{T}$ ) is applied orthogonal to the sensing plane, with the visual depiction showing the case for a magnetic field out of the page. The Lorentz force ( $F_B$ ) deflects charge carrier to one side of the sample which subsequently induces a electric field which exerts a force ( $F_E$ ) which induces a Hall voltage which is measured between contacts 2 and 3. This is repeated in four contact configurations, (i.e.  $I_{14}$ ,  $I_{41}$ ,  $I_{23}$ ,  $I_{32}$ ).

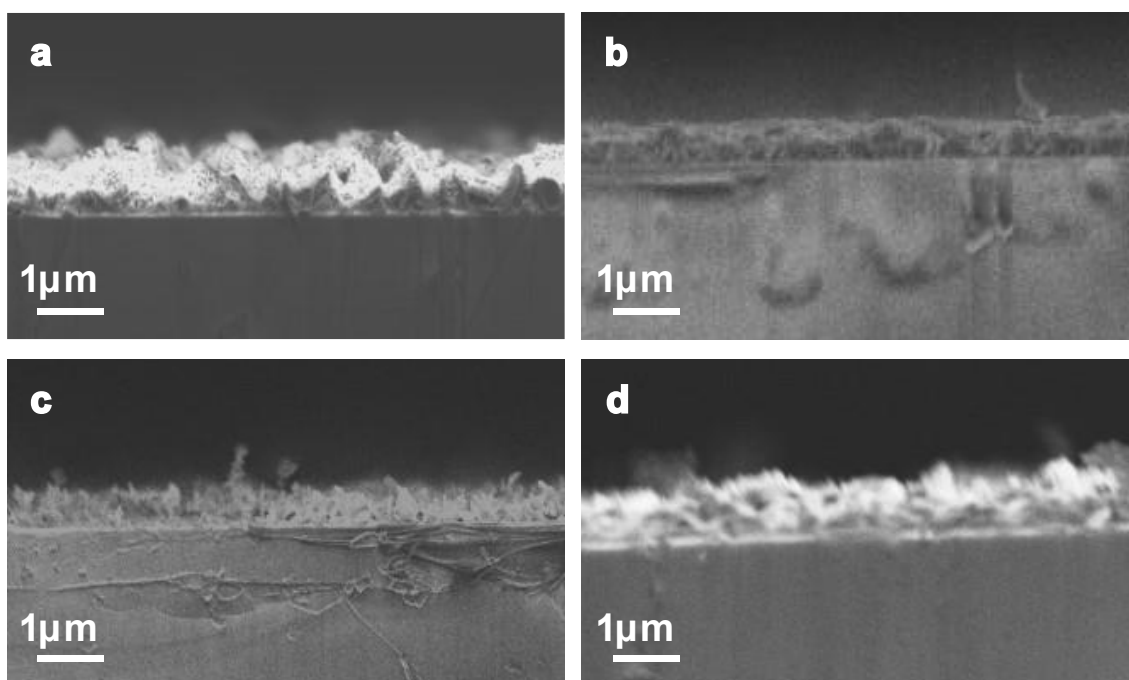

**Figure S13:** Cross-sectional SEM images of  $\text{WS}_{2x}\text{Se}_{2-2x}$  films produced *via* low-pressure CVD, where a-d represents films produced from SSPs (1)-(4), respectively.

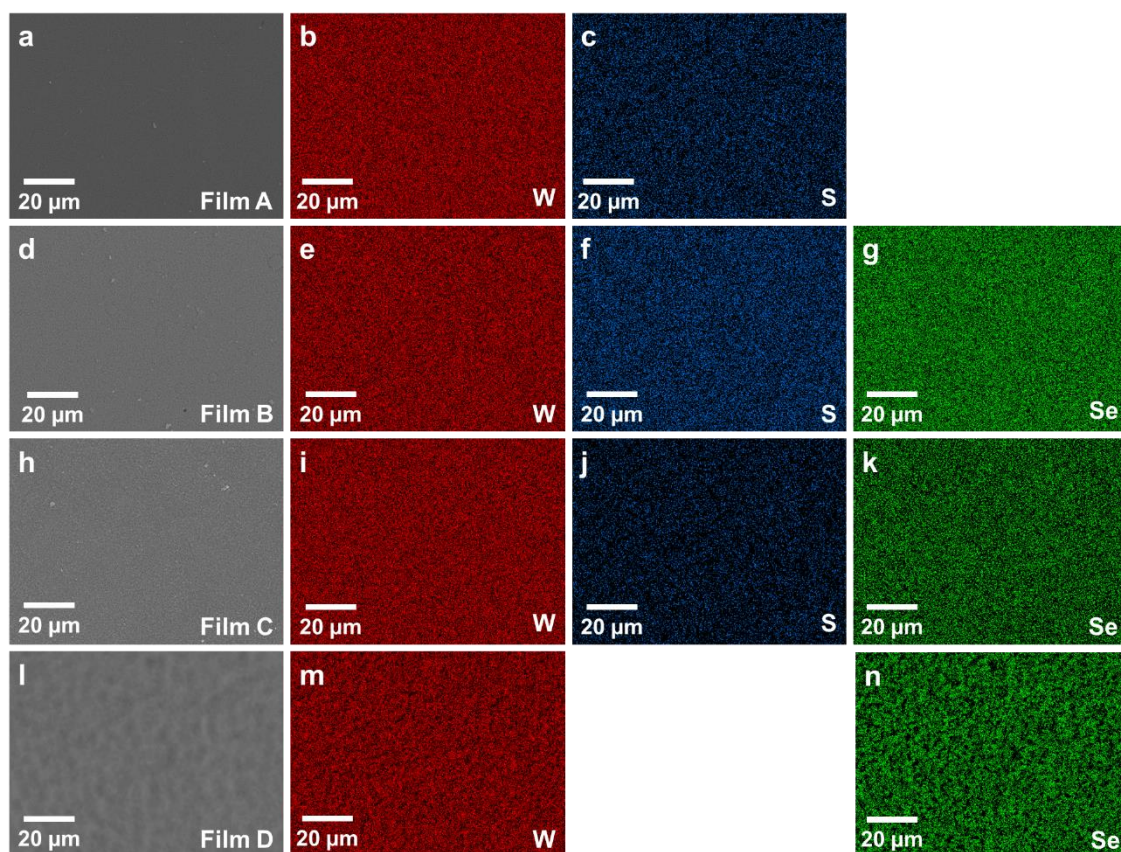

**Figure S14:** SEM image and associated EDX element mapping of film A (a-c); film B (d-g); film C (h-k); and film D (l-n).

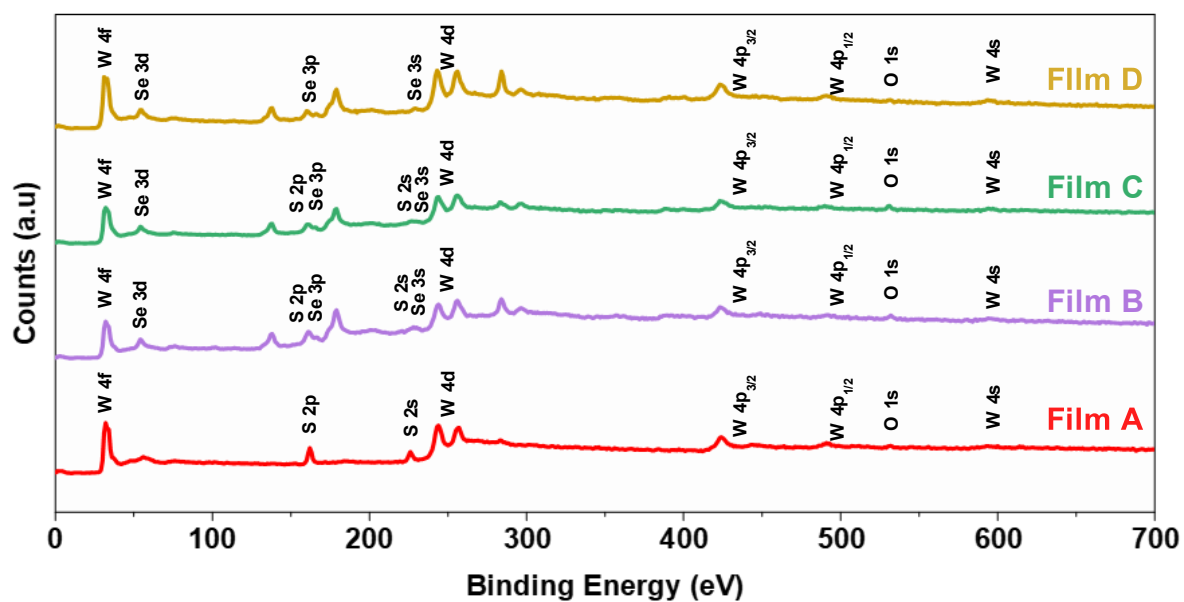

**Figure S15:** Survey scans over the range 0-700 eV for all as-deposited  $WS_{2x}Se_{2-2x}$  films deposited from precursors (1)-(4), with the atomic orbitals labelled. The remaining peaks are related to Auger electron detection.
